# Supplementary material for: Leveraging Artificial Intelligence to Optimize Vaccine Delivery and Cold Chain Logistics in Remote Areas: A Scoping Review
Source: Research Square preprint supplement (doi:10.21203/rs.3.rs-8115717/v1), 2025-11-20
Supplement: Supplementary file 1 [file 39d7900d8a7fa7deabb710b5.xlsx]

## Sheet: Sheet1
Author (Year)	Country/Region	AI Technique / Domain	Cold Chain / Delivery Focus	Study Design	Reported Outcomes	Setting (HIC/LMIC)
Gopinath et al. (2025)	India	ML + IoT anomaly detection	Temperature breach prediction	Field pilot	23% reduction in spoilage	LMIC
Musa et al. (2025)	Nigeria	Predictive analytics	Supply forecasting	Model simulation	87% forecast accuracy	LMIC
Christopher et al. (2024)	Global (multi-region)	Reinforcement learning	Routing optimization	Simulation	30% delivery time reduction	Mixed
Maluskar et al. (2025)	India	AI-controlled Peltier cooling	Frugal refrigeration	Prototype validation	Stable 2–8 °C under 5 hr outage	LMIC
Jairoun et al. (2025)	UAE	Drone path optimization (RL)	Aerial vaccine delivery	Case study	42 min avg delivery time	HIC
Addy (2023)	Ghana	ML demand prediction	Distribution network optimization	Cross-sectional	15% stockout reduction	LMIC
Pambudi et al. (2022)	Indonesia	IoT + AI control	Real-time cold chain monitoring	Pilot	20% energy savings	LMIC
Vuvor et al. (2025)	Africa (review)	Conceptual digital logistics	Supply resilience	Review	–	LMIC
Zipline Project (2021-2024)	Ghana / Rwanda	AI routing + fleet management	Drone vaccine transport	Implementation	>50% delivery time cut	LMIC
WHO SmartChain (2021)	Multi-country	Decision-support AI	Inventory tracking	Policy pilot	Improved resupply accuracy	LMIC
FrozeNet (2022)	USA / India	Predictive ML	IoT cold chain	Industry deployment	19% cost reduction	Mixed
UNICEF VaxChain (2023)	Global	Analytics dashboard	Monitoring + forecasting	Program evaluation	Improved vaccine integrity	Mixed
Shrestha et al. (2023)	Nepal	CNN-based temperature vision	Cold storage fault detection	Prototype	95% accuracy	LMIC
Mwangi et al. (2024)	Kenya	ML clustering	Route grouping for remote clinics	Field simulation	27% travel time reduction	LMIC
Zhang et al. (2023)	China	XGBoost + IoT	Vaccine freezer performance	Experimental	90% predictive precision	HIC
Kim et al. (2022)	Korea	Deep RL	Autonomous drone delivery	Simulation	40% route optimization	HIC
El-Ghazali et al. (2021)	Egypt	ML + solar optimization	PV cold box efficiency	Prototype	18% lower energy use	LMIC
Li et al. (2020)	China	Gradient boosting	Demand prediction	Retrospective data analysis	88% accuracy	HIC
Adeyemi et al. (2023)	Nigeria	IoT sensor network + AI	Cold chain breach alerts	Pilot	22% spoilage drop	LMIC
Singh et al. (2024)	India	Federated ML	Multi-region logistics	Cross-site simulation	+16% predictive accuracy	LMIC
Rahman et al. (2021)	Bangladesh	Time-series forecasting	Stock management	Case series	12% improved supply accuracy	LMIC
Ramaswamy et al. (2019)	India	ML classifier	Fault detection in a solar fridge	Prototype	91% detection accuracy	LMIC
Smith et al. (2019)	UK	ML + heuristics	Distribution planning	Model evaluation	10% cost reduction	HIC
Bhatnagar et al. (2022)	India	ML regression	Cold box temperature drift	Experimental	±1.5 °C precision	LMIC
Torres et al. (2020)	Brazil	Route optimization (GA)	Rural drone delivery	Simulation	35% distance cut	LMIC
Osei et al. (2022)	Ghana	Decision-tree model	Cold chain breach detection	Field pilot	20% alert accuracy gain	LMIC
Duong et al. (2021)	Vietnam	ML + IoT	Vaccine warehouse analytics	Deployment	17% energy cut	LMIC
Menon et al. (2020)	India	Hybrid ML + IoT	Vaccine freezer failure alerts	Prototype	93% detection accuracy	LMIC
Pfaff et al. (2023)	Germany	AI supply simulation	National cold chain optimization	Simulation	25% throughput increase	HIC
Gonzales et al. (2020)	Philippines	ML routing	Mobile delivery	Prototype	13% delivery time drop	LMIC
Dar et al. (2023)	Pakistan	ANN	Cold room anomaly detection	Pilot	89% accuracy	LMIC
Lin et al. (2020)	Taiwan	Bayesian regression	Cold storage control	Experimental	Lower uncertainty	HIC
Al-Hassan et al. (2022)	Saudi Arabia	AI logistics optimizer	Vaccine warehouse	Case study	12% stock variance cut	HIC
Arunkumar et al. (2018)	India	IoT + SVM	Cold chain monitoring	Pilot	Stable temp control	LMIC
Kalema et al. (2021)	Uganda	CNN image detection	Cold unit leak detection	Prototype	90% detection accuracy	LMIC
Dlamini et al. (2023)	South Africa	RL routing	Drone optimization	Field pilot	41% delivery efficiency	LMIC
Huang et al. (2022)	Taiwan	Predictive ML	Demand planning	Simulation	92% accuracy	HIC
Luo et al. (2019)	China	Gradient boosting	Energy optimization	Model test	15% energy saving	HIC
Garba et al. (2023)	Nigeria	ML IoT	Temperature stability	Pilot	87% alert accuracy	LMIC
Ebrahim et al. (2021)	Sudan	ANN	Vaccine truck cooling	Simulation	19% energy cut	LMIC
Zhou et al. (2024)	China	Deep RL + IoT	Cold warehouse scheduling	Model simulation	26% efficiency gain	HIC
Kato et al. (2023)	Japan	ML + AR monitoring	Smart fridges	Pilot	High interpretability	HIC
Sambo et al. (2020)	Nigeria	ML forecasting	Rural clinic supply	Field pilot	14% improved delivery	LMIC
Olowu et al. (2021)	Nigeria	ML + IoT	Smart vaccine carrier	Prototype	Stable cooling	LMIC
Bekele et al. (2024)	Ethiopia	CNN anomaly detection	Solar fridge efficiency	Prototype	92% accuracy	LMIC
Nkosi et al. (2022)	South Africa	AI predictive control	Refrigeration cycles	Simulation	11% power saving	LMIC
Mwansa et al. (2023)	Zambia	ML classifier	Remote fridge monitoring	Pilot	19% failure reduction	LMIC
Yu et al. (2022)	China	LSTM + IoT	Predictive maintenance	Prototype	95% precision	HIC
UNICEF (2020)	Global	Heuristic ML	Vaccine shipment planning	Policy report	10% transport cost cut	Mixed
Gavi (2021)	Multi-country	Predictive analytics	Cold chain optimization	Report synthesis	Efficiency gains	Mixed
WHO (2019)	Global	AI conceptual	Cold chain policy	Policy brief	–	Global
Ndlovu et al. (2022)	Zimbabwe	ML sensor analytics	Rural cold chain	Pilot	18% fewer outages	LMIC
Liu et al. (2025)	China	XGBoost	Temperature forecasting	Simulation	93% accuracy	HIC
Ahmed et al. (2022)	Egypt	RL scheduling	Vaccine delivery truck routing	Simulation	29% travel time cut	LMIC
Abu Bakar et al. (2023)	Malaysia	Predictive ML	IoT vaccine storage	Experimental	94% prediction accuracy	LMIC
Bello et al. (2024)	Nigeria	ML demand model	Regional forecasting	Field pilot	17% fewer stockouts	LMIC
