# Supplementary material for: Leveraging Artificial Intelligence to Optimize Vaccine Delivery and Cold Chain Logistics in Remote Areas: A Scoping Review
Source: Research Square preprint supplement (doi:10.21203/rs.3.rs-8115717/v1), 2025-11-20
Supplement: Supplementary file 2 [file 5cf7d9c579d7ba48d469ff72.docx]

**Search Strategy**

| **Database** | **Search string** |
| --- | --- |
| **PubMed** | (“artificial intelligence” OR “machine learning” OR “deep learning” OR “predictive analytics” OR “internet of things” OR “IoT” OR “drones” OR “autonomous delivery”)  AND (“vaccine delivery” OR “immunization logistics” OR “cold chain” OR “cold storage” OR “supply chain” OR “last-mile delivery”)  AND (“remote areas” OR “rural” OR “low-resource” OR “low- and middle-income countries” OR “LMICs”) |
| **SCOPUS** | (TITLE-ABS-KEY("artificial intelligence" OR "machine learning" OR "deep learning"  OR "neural network*" OR "predictive analytics" OR "internet of things" OR IoT  OR "autonomous delivery" OR drone* OR "route optimization" OR "reinforcement learning"  OR "decision support" OR "cold chain monitoring"))  AND  (TITLE-ABS-KEY("vaccine delivery" OR "immunization" OR "vaccination logistics"  OR "last-mile delivery" OR "cold chain" OR "vaccine storage" OR "temperature monitoring"  OR "vaccine supply chain" OR "inventory management" OR "vaccine distribution"))  AND  (TITLE-ABS-KEY("remote areas" OR rural OR "low-resource" OR "resource-limited"  OR LMIC* OR "developing countr*" OR "hard-to-reach" OR "low-income"  OR "middle-income"))  AND (PUBYEAR > 2014)  AND (LIMIT-TO(LANGUAGE, "English")) |
| **Web of Science** | TS=("artificial intelligence" OR "machine learning" OR "deep learning"  OR "neural network*" OR "internet of things" OR IoT OR "predictive model*"  OR "autonomous delivery" OR drone* OR "route optimization"  OR "reinforcement learning")  AND  TS=("vaccine delivery" OR "immunization logistics" OR "cold chain"  OR "vaccine storage" OR "temperature monitoring"  OR "vaccine supply chain" OR "last-mile delivery")  AND  TS=("remote areas" OR rural OR "low-resource" OR LMIC* OR "resource-limited"  OR "developing countr*" OR "low-income" OR "middle-income")  Refined by: Language = English; Timespan = 2015–2025 |
| **IEEE XPLORE** | (("All Metadata":"artificial intelligence" OR "All Metadata":"machine learning"  OR "All Metadata":"deep learning" OR "All Metadata":"neural network"  OR "All Metadata":"internet of things" OR "All Metadata":"IoT"  OR "All Metadata":"predictive analytics"  OR "All Metadata":"autonomous drone" OR "All Metadata":"route optimization"))  AND  (("All Metadata":"vaccine delivery" OR "All Metadata":"immunization logistics"  OR "All Metadata":"cold chain" OR "All Metadata":"temperature monitoring"  OR "All Metadata":"vaccine storage" OR "All Metadata":"supply chain"))  AND  (("All Metadata":"remote" OR "All Metadata":"rural"  OR "All Metadata":"low-resource" OR "All Metadata":"LMIC"))  Filters:  - Content type: Journals + Conferences  - Year: 2015–2025  - Language: English |
| Cochrance | ("artificial intelligence" OR "machine learning" OR "deep learning"  OR "predictive analytics" OR "internet of things" OR IoT  OR drone* OR "route optimization")  AND  ("vaccine delivery" OR immunization OR "vaccine storage"  OR "vaccine supply chain" OR "cold chain" OR "temperature monitoring")  AND  ("remote area*" OR rural OR "low-resource" OR LMIC* OR "resource-limited") |
| **Embase** | ('artificial intelligence'/exp OR 'machine learning'/exp OR 'deep learning'/exp  OR 'neural network'/exp OR 'internet of things'/exp OR 'predictive model*':ti,ab  OR 'drone*':ti,ab OR 'autonomous delivery':ti,ab)  AND  ('vaccine'/exp AND ('cold chain'/exp OR 'temperature monitoring'/exp  OR 'vaccine storage':ti,ab OR 'vaccine delivery':ti,ab  OR 'immunization logistics':ti,ab OR 'supply chain':ti,ab))  AND  ('remote area*':ti,ab OR rural:ti,ab OR 'low-resource':ti,ab  OR LMIC*:ti,ab OR 'resource-limited':ti,ab  OR 'developing countr*':ti,ab)  AND [english]/lim AND [2015-2025]/py |
